# Supplementary material for: Variability in deer diet and plant vulnerability to browsing among forests with different establishment years of sika deer
Source: PeerJ. 2021 Sep 17;9:e12165. doi: 10.7717/peerj.12165 (PMC8451445; doi:10.7717/peerj.12165)
Supplement: Supplemental Information 2 [file peerj-09-12165-s002.xlsx]

## Sheet: Table S2
Table S2
Species groups representing the lowest taxonomic levels in the P6-loop database and their associated families.
Species in bold letters indicate samples collected in this study. Samples with accession number indicate sequences, which were not recorded in the previous database.
Group name	Species	Family	Accession number	Reference
Actinidia arguta	Actinidia arguta	Actinidiaceae		Nakahama et al. 2020
Actinidia polygama	Actinidia polygama	Actinidiaceae		Nakahama et al. 2020
Sambucus racemosa	Sambucus racemosa	Adoxaceae		Genbank
Viburnum spp.1	Viburnum dilatatum	Adoxaceae		Genbank
Viburnum spp.1	Viburnum furcatum	Adoxaceae		Nakahama et al. 2020
Viburnum opulus var. sargentii	Viburnum opulus var. sargentii	Adoxaceae	LC586485
Viburnum spp.1	Viburnum wrightii	Adoxaceae		Nakahama et al. 2020
Achyranthes bidentata	Achyranthes bidentata	Amaranthaceae		Nakahama et al. 2020
Rhus javanica var. chinensis	Rhus javanica	Anacardiaceae		Nakahama et al. 2020
Toxicodendron spp.1	Toxicodendron orientale	Anacardiaceae		Nakahama et al. 2020
Toxicodendron spp.1	Toxicodendron trichocarpum	Anacardiaceae		Nakahama et al. 2020
Angelica edulis	Angelica edulis	Apiaceae	LC586467
Angelica pubescens	Angelica pubescens	Apiaceae		Nakahama et al. 2020
Cryptotaenia japonica	Cryptotaenia japonica	Apiaceae		Genbank
Oenanthe javanica	Oenanthe javanica	Apiaceae	LC586469
Sanicula chinensis	Sanicula chinensis	Apiaceae	LC586468
Apiaceae 1	Spuriopimpinella calycina	Apiaceae		Nakahama et al. 2020
Tilingia ajanensis	Tilingia ajanensis	Apiaceae		Genbank
Torilis japonica	Torilis japonica	Apiaceae	LC586470
Cynanchum caudatum var. caudatum	Cynanchum caudatum var. caudatum	Apocynaceae
Ilex spp.1	Ilex crenata var. radicasn	Aquifoliaceae		Nakahama et al. 2020
Ilex spp.1	Ilex leucoclada	Aquifoliaceae		Nakahama et al. 2020
Ilex spp.1	Ilex macropoda	Aquifoliaceae		Nakahama et al. 2020
Lysichiton camtschatcensis	Lysichiton camtschatcensis	Araceae		Genbank
Aralia elata	Aralia elata	Araliaceae
Aralia elata	Aralia elata	Araliaceae		Genbank
Araliaceae 1	Chengiopanax sciadophylloides	Araliaceae		Nakahama et al. 2020
Araliaceae 1	Eleutherococcus spinosus	Araliaceae		Nakahama et al. 2020
Araliaceae 1	Gamblea innovans	Araliaceae		Nakahama et al. 2020
Hedera rhombea	Hedera rhombea	Araliaceae	LC586478
Hydrocotyle maritima	Hydrocotyle maritima	Araliaceae	LC586479
Hydrocotyle spp.1	Hydrocotyle ramiflora	Araliaceae		Nakahama et al. 2020
Hydrocotyle spp.1	Hydrocotyle yabei	Araliaceae		Nakahama et al. 2020
Kalopanax septemlobus	Kalopanax septemlobus	Araliaceae		Nakahama et al. 2020
Araliaceae 1	Panax japonicus	Araliaceae		Genbank
Asarum tohokuense	Asarum tohokuense	Aristolochiaceae		Genbank
Hosta sieboldiana	Hosta sieboldiana	Asparagaceae	LC586453
Maianthemum japonicum	Maianthemum japonicum	Asparagaceae		Genbank
Asteraceae 3	Adenocaulon himalaicum	Asteraceae		Nakahama et al. 2020
Ainsliaea apiculata	Ainsliaea apiculata	Asteraceae		Nakahama et al. 2020
Ainsliaea apiculata var. subapoda	Ainsliaea apiculata var. subapoda	Asteraceae		Nakahama et al. 2020
Artemisia spp.	Artemisia indica	Asteraceae		Genbank
Artemisia spp.	Artemisia japonica	Asteraceae		Genbank
Asteraceae 4	Aster glehnii	Asteraceae		Nakahama et al. 2020
Aster. spp.1	Aster microcephalus var. ovatus	Asteraceae		Nakahama et al. 2020
Aster. spp.1	Aster savatieri	Asteraceae		Nakahama et al. 2020
Bidens frondosa	Bidens frondosa	Asteraceae		Nakahama et al. 2020
Asteraceae 3	Carpesium divaricatum	Asteraceae		Genbank
Asteraceae 3	Carpesium triste	Asteraceae		Nakahama et al. 2020
Cirsium spp.1	Cirsium borealinipponense	Asteraceae		Nakahama et al. 2020
Asteraceae 2	Crepidiastrum denticulatum	Asteraceae		Genbank
Erigeron philadelphicus	Erigeron philadelphicus	Asteraceae		Genbank
Eupatorium spp.1	Eupatorium glehnii	Asteraceae		Nakahama et al. 2020
Eupatorium spp.1	Eupatorium lindleyanum	Asteraceae		Nakahama et al. 2020
Eupatorium spp.1	Eupatorium makinoi	Asteraceae		Nakahama et al. 2020
Asteraceae 2	Ixeridium dentatum	Asteraceae		Nakahama et al. 2020
Asteraceae 2	Ixeris stolonifera	Asteraceae		Nakahama et al. 2020
Asteraceae 1	Parasenecio delphiniifolius	Asteraceae		Nakahama et al. 2020
Asteraceae 1	Parasenecio farfarifolius var. bulbifer	Asteraceae		Nakahama et al. 2020
Asteraceae 1	Parasenecio nikomontanus	Asteraceae		Nakahama et al. 2020
Asteraceae 1	Parasenecio peltifolius	Asteraceae		Nakahama et al. 2020
Asteraceae 1	Parasenecio robustus	Asteraceae		Nakahama et al. 2020
Asteraceae 1	Petasites japonicus var. japonicus	Asteraceae		Nakahama et al. 2020
Asteraceae 3	Rudbeckia laciniata	Asteraceae		Nakahama et al. 2020
Asteraceae 4	Solidago virgaurea	Asteraceae		Nakahama et al. 2020
Asteraceae 1	Syneilesis palmata	Asteraceae		Genbank
Impatiens noli-tangere	Impatiens noli-tangere	Balsaminaceae	LC586465
impatiens textorii	impatiens textorii	Balsaminaceae		Nakahama et al. 2020
Epimedium koreanum	Epimedium koreanum	Berberidaceae		Genbank
Betula ermanii	Betula ermanii	Betulaceae	LC586477
Betula grossa	Betula grossa	Betulaceae		Nakahama et al. 2020
Betulaceae spp.1	Carpinus cordata	Betulaceae		Genbank
Betulaceae spp.1	Carpinus japonica	Betulaceae		Nakahama et al. 2020
Betulaceae spp.1	Carpinus laxiflora	Betulaceae		Nakahama et al. 2020
Betulaceae spp.1	Carpinus tschonoskii	Betulaceae		Nakahama et al. 2020
Betulaceae spp.1	Corylus sieboldiana	Betulaceae		Nakahama et al. 2020
Ostrya japonica	Ostrya japonica	Betulaceae		Genbank
Cardamine leucantha	Cardamine leucantha	Brassicaceae		Genbank
Adenophora remotiflora	Adenophora remotiflora	Campanulaceae		Genbank
Pracarpa carnosa	Pracarpa carnosa	Campanulaceae		Nakahama et al. 2020
Abelia spathulata	Abelia spathulata	Caprifoliaceae	LC586473
Lonicera gracilipes	Lonicera gracilipes	Caprifoliaceae	LC586472
Lonicera japonica	Lonicera japonica	Caprifoliaceae		Genbank
Patrinia villosa	Patrinia villosa	Caprifoliaceae		Genbank
Weigela hortensis	Weigela hortensis	Caprifoliaceae		Nakahama et al. 2020
Stellaria diversiflora	Stellaria diversiflora	Caryophyllaceae		Nakahama et al. 2020
Stellaria sessiliflora	Stellaria sessiliflora	Caryophyllaceae		Nakahama et al. 2020
Stellaria uliginosa	Stellaria uliginosa	Caryophyllaceae		Nakahama et al. 2020
Celastrus orbiculatus	Celastrus orbiculatus	Celastraceae		Nakahama et al. 2020
Euonymus alatus	Euonymus alatus	Celastraceae		Nakahama et al. 2020
Eunonymus spp.1	Euonymus alatus var. altus f. striatus	Celastraceae		Genbank
Eunonymus spp.1	Euonymus fortunei	Celastraceae		Nakahama et al. 2020
Eunonymus spp.1	Euonymus japonicus	Celastraceae		Nakahama et al. 2020
Euonymus oxyphyllus	Euonymus oxyphyllus	Celastraceae		Genbank
Eunonymus spp.1	Euonymus sieboldianus	Celastraceae		Nakahama et al. 2020
Cercidiphyllum japonicum	Cercidiphyllum japonicum	Cercidiphyllaceae		Nakahama et al. 2020
Chloranthus serratus	Chloranthus serratus	Chloranthaceae		Genbank
Clethra barbinervis	Clethra barbinervis	Clethraceae		Nakahama et al. 2020
Disporum sessile var. sessile	Disporum sessile	Colchicaceae		Nakahama et al. 2020
Disporum smilacinum	Disporum smilacinum	Colchicaceae		Genbank
Commelina communis	Commelina communis	Commelinaceae		Nakahama et al. 2020
Alangium platanifolium	Alangium platanifolium	Cornaceae		Nakahama et al. 2020
Cornus controversa	Cornus controversa	Cornaceae		Nakahama et al. 2020
Cornus kousa	Cornus kousa	Cornaceae		Nakahama et al. 2020
Cornus macrophylla	Cornus macrophylla	Cornaceae		Nakahama et al. 2020
Gynostemma pentaphyllum	Gynostemma pentaphyllum	Cucurbitaceae		Nakahama et al. 2020
Schizopepon bryoniifolius	Schizopepon bryoniifolius	Cucurbitaceae		Genbank
Chamaecyparis obtusa	Chamaecyparis obtusa	Cupressaceae		Nakahama et al. 2020
Cryptomeria japonica	Cryptomeria japonica	Cupressaceae		Nakahama et al. 2020
Carex blepharicarpa	Carex blepharicarpa	Cyperaceae		Nakahama et al. 2020
Carex confertiflora	Carex confertiflora	Cyperaceae		Nakahama et al. 2020
Cyperaceae 1	Carex flabellata	Cyperaceae		Nakahama et al. 2020
Carex foliosissima	Carex foliosissima	Cyperaceae		Nakahama et al. 2020
Carex maximowiczii	Carex maximowiczii	Cyperaceae		Nakahama et al. 2020
Cyperaceae 1	Carex mollicula	Cyperaceae		Nakahama et al. 2020
Cyperaceae 1	Carex muitifolia	Cyperaceae		Nakahama et al. 2020
Carex shimidzensis	Carex shimidzensis	Cyperaceae		Nakahama et al. 2020
Daphniphyllum macropodum	Daphniphyllum macropodum	Daphniphyllaceae		Nakahama et al. 2020
Schizocodon soldanelloides var .magnus	Schizocodon soldanelloides var .magnus	Diapensiaceae		Nakahama et al. 2020
Shortia uniflora	Shortia uniflora	Diapensiaceae		Nakahama et al. 2020
Dioscorea japonica	Dioscorea japonica	Dioscoreaceae		Nakahama et al. 2020
Dioscorea spp.1	Dioscorea nipponica	Dioscoreaceae		Genbank
Dioscorea spp.1	Dioscorea quinquelobata	Dioscoreaceae		Genbank
Dioscorea tokoro	Dioscorea tokoro	Dioscoreaceae		Genbank
Elliottia paniculata	Elliottia paniculata	Ericaceae	LC586466
Pryola japonica	Pryola japonica	Ericaceae		Genbank
Rhododendron spp.2	Rhododendron multiflorum	Ericaceae		Genbank
Rhododendron pentandrum	Rhododendron pentandrum	Ericaceae		Genbank
Rhododendron spp.1	Rhododendron kaempferi	Ericaceae		Nakahama et al. 2020
Vaccinium japonicum	Vaccinium japonicum	Ericaceae		Nakahama et al. 2020
Wisteria floribunda	Wisteria floribunda	Fabaceae		Nakahama et al. 2020
Amphicarpaea edgeworthii	Amphicarpaea edgeworthii	Fagaceae		Nakahama et al. 2020
Castanea crenata	Castanea crenata	Fagaceae		Nakahama et al. 2020
Fagus crenata	Fagus crenata	Fagaceae		Nakahama et al. 2020
Fagus japonica	Fagus japonica	Fagaceae		Nakahama et al. 2020
Hylodesmum podocarpum subsp. oxyphyllum	Hylodesmum podocarpum subsp. oxyphyllum	Fagaceae	LC586457
Lespedeza bicolor Turcz.var.bicolor	Lespedeza bicolor Turcz.var. bicolor	Fagaceae		Genbank
Pueraria lobata	Pueraria lobata	Fagaceae		Nakahama et al. 2020
Quercus crispula	Quercus crispula	Fagaceae		Nakahama et al. 2020
Quercus serrata	Quercus serrata	Fagaceae		Nakahama et al. 2020
Trifolium pratense	Trifolium pratense	Fagaceae		Genbank
Aucuba japonica var. borealis	Aucuba japonica var. borealis	Garryaceae	LC586456
Swertia bimaculata	Swertia bimaculata	Gentianaceae	LC586452
Tripterospermum japonicum	Tripterospermum japonicum	Gentianaceae		Nakahama et al. 2020
Geranium thunbergii	Geranium thunbergii	Geraniaceae		Nakahama et al. 2020
Hamamelis japonica	Hamamelis japonica	Hamamelidaceae		Nakahama et al. 2020
Hydrangeaceae 1	Calyptranthe petiolaris	Hydrangeaceae		Nakahama et al. 2020
Deutzia crenata	Deutzia crenata	Hydrangeaceae		Nakahama et al. 2020
Hydrangeaceae 1	Heteromalla paniculata	Hydrangeaceae		Nakahama et al. 2020
Hortensia cuspidata	Hortensia cuspidata	Hydrangeaceae		Nakahama et al. 2020
Philadelphus satsumi	Philadelphus satsumi	Hydrangeaceae	LC586483
Hydrangeaceae 1	Schizophragma hydrangeoides	Hydrangeaceae		Nakahama et al. 2020
Hypericum erectum	Hypericum erectum	Hypericaceae		Genbank
Hypericum pesudopetiolatum	Hypericum pesudopetiolatum	Hypericaceae		Nakahama et al. 2020
Juglans mandshurica var. sachalinensis	Juglans mandshurica	Juglandaceae		Nakahama et al. 2020
Pterocarya rhoifolia	Pterocarya rhoifolia	Juglandaceae		Nakahama et al. 2020
Ajuga spp.1	Ajuga decumbens	Lamiaceae		Nakahama et al. 2020
Ajuga spp.1	Ajuga yesoensis	Lamiaceae		Nakahama et al. 2020
Callicarpa japonica	Callicarpa japonica	Lamiaceae		Nakahama et al. 2020
Chelonopsis moschata	Chelonopsis moschata	Lamiaceae		Genbank
Clerodendrum trichotomum	Clerodendrum trichotomum	Lamiaceae		Nakahama et al. 2020
Clinopodium spp.	Clinopodium micranthum	Lamiaceae		Nakahama et al. 2020
Comanthosphace japonica	Comanthosphace japonica	Lamiaceae		Genbank
Isodon inflexus	Isodon inflexus	Lamiaceae	LC586476
Isodon sp.	Isodon trichocarpus	Lamiaceae		Nakahama et al. 2020
Mosla scabra	Mosla scabra	Lamiaceae		Nakahama et al. 2020
Perilla citriodora	Perilla citriodora	Lamiaceae	LC586484
Salvia nipponica	Salvia nipponica	Lamiaceae	LC586475
Akebia quinata	Akebia quinata	Lardizabalaceae		Nakahama et al. 2020
Akebia trifoliata	Akebia trifoliata	Lardizabalaceae		Genbank
Lindera umbellata	Lindera umbellata	Lauraceae		Nakahama et al. 2020
Cardiocrinum cordatum	Cardiocrinum cordatum	Liliaceae		Genbank
Tricyrtis afinis	Tricyrtis affinis	Liliaceae		Nakahama et al. 2020
Tricyrtis latifolia	Tricyrtis latifolia	Liliaceae		Genbank
Lythrum anceps	Lythrum anceps	Lythraceae		Nakahama et al. 2020
Magnolia kobus	Magnolia kobus	Magnoliaceae		Genbank
Magnolia spp.1	Magnolia obovata	Magnoliaceae		Nakahama et al. 2020
Magnolia spp.1	Magnolia salicfolia	Magnoliaceae		Nakahama et al. 2020
Tilia japonica	Tilia japonica	Malvaceae		Genbank
Tilia maximowicziana	Tilia maximowicziana	Malvaceae	LC586474
Mazus miquelii	Mazus miquelii	Mazaceae		Nakahama et al. 2020
Paris tetraphylla	Paris tetraphylla	Melanthiaceae	LC586454
Trillium apetalon	Trillium apetalon	Melanthiaceae		Nakahama et al. 2020
Morus australis	Morus australis	Moraceae		Genbank
Fraxinus sieboldiana	Fraxinus sieboldiana	Oleaceae		Nakahama et al. 2020
Ligustrum spp.1	Ligustrum obtusifolium	Oleaceae		Genbank
Circaea erubescens	Circaea erubescens	Onagraceae		Genbank
Epilobium pyrricholophum	Epilobium pyrricholophum	Onagraceae		Nakahama et al. 2020
Goodyera schlechtendaliana	Goodyera schlechtendaliana	Orchidaceae		Nakahama et al. 2020
Oxalis corniculata	Oxalis corniculata	Oxalidaceae		Nakahama et al. 2020
Oxalis griffithii	Oxalis griffithii	Oxalidaceae		Nakahama et al. 2020
Corydalis incisa	Corydalis incisa	Papaveraceae		Nakahama et al. 2020
Corydalis orthoceras	Corydalis orthoceras	Papaveraceae		Nakahama et al. 2020
Corydalis pallida	Corydalis pallida	Papaveraceae		Nakahama et al. 2020
Macleaya cordata	Macleaya cordata	Papaveraceae		Genbank
Eurya japonica	Eurya japonica	Pentaphylacaceae		Nakahama et al. 2020
Phryma nana	Phryma nana	Phrymaceae		Genbank
Larix kaempferi	Larix kaempferi	Pinaceae		Genbank
Pinus densiflora	Pinus densiflora	Pinaceae		Nakahama et al. 2020
Plantago asiatica	Plantago asiatica	Plantaginaceae		Nakahama et al. 2020
Veronicastrum sibiricum	Veronicastrum sibiricum	Plantaginaceae	LC586838
Microstegium vimineum	Microstegium vimineum	Poaceae		Nakahama et al. 2020
Miscanthus sinensis	Miscanthus sinensis	Poaceae		Nakahama et al. 2020
Oplismenus undulatifolius var. undulatifolius	Oplismenus undulatifolius	Poaceae		Nakahama et al. 2020
Phragmites spp.1	Phragmites japonicus	Poaceae		Nakahama et al. 2020
Sasa spp.1	Sasa kurilensis	Poaceae		Nakahama et al. 2020
Fallopia spp.1	Fallopia japonica	Polygonaceae		Nakahama et al. 2020
Fallopia spp.1	Fallopia sachalinensis	Polygonaceae		Nakahama et al. 2020
Persicaria debilis	Persicaria debilis	Polygonaceae		Nakahama et al. 2020
Persicaria filiformis	Persicaria filiformis	Polygonaceae		Genbank
Persicaria spp.1	Persicaria longiseta	Polygonaceae		Nakahama et al. 2020
Persicaria muricata	Persicaria muricata	Polygonaceae		Nakahama et al. 2020
Persicaria nepalensis	Persicaria nepalensis	Polygonaceae		Genbank
Persicaria spp.1	Persicaria posumbu	Polygonaceae		Nakahama et al. 2020
Persicaria thunbergii	Persicaria thunbergii	Polygonaceae		Nakahama et al. 2020
Ardisia japonica	Ardisia japonica	Primulaceae		Genbank
Lysimachia clethroides	Lysimachia clethroides	Primulaceae		Genbank
Lysimachia fortunei	Lysimachia fortunei	Primulaceae		Nakahama et al. 2020
Lysimachia japonica	Lysimachia japonica	Primulaceae		Nakahama et al. 2020
Actaea asiatica	Actaea asiatica	Ranunculaceae		Genbank
Anemone flaccida	Anemone flaccida	Ranunculaceae		Nakahama et al. 2020
Cimicifuga japonica	Cimicifuga japonica	Ranunculaceae		Genbank
Cimicifuga simplex	Cimicifuga simplex	Ranunculaceae		Genbank
Clematis apiifolia	Clematis apiifolia	Ranunculaceae		Nakahama et al. 2020
Glaucidium palmatum	Glaucidium palmatum	Ranunculaceae		Genbank
Ranunculus silerifolius	Ranunculus silerifolius	Ranunculaceae		Nakahama et al. 2020
Berchemia racemosa	Berchemia racemosa	Rhamnaceae		Nakahama et al. 2020
Hovenia trichocarpa	Hovenia trichocarpa	Rhamnaceae		Nakahama et al. 2020
Agrimonia pilosa	Agrimonia pilosa	Rosaceae	LC586461
Rosaceae 1	Aria alnifolia	Rosaceae		Nakahama et al. 2020
Aruncus dioicus	Aruncus dioicus	Rosaceae	LC586463
Cerusus spp. 1	Cerasus sp.	Rosaceae		Nakahama et al. 2020
Filipendula camtschatica	Filipendula camtschatica	Rosaceae	LC586460
Kerria japonica	Kerria japonica	Rosaceae	LC586462
Neillia incisa	Neillia incisa	Rosaceae		Genbank
Padus grayana	Padus grayana	Rosaceae		Nakahama et al. 2020
Potentilla centigrana	Potentilla centigrana	Rosaceae		Nakahama et al. 2020
Potentilla fragarioides	Potentilla fragarioides	Rosaceae	LC586459
Potentilla freyniana	Potentilla freyniana	Rosaceae	LC586458
Rosaceae 1	Pourthiaea villosa	Rosaceae		Nakahama et al. 2020
Rosa multiflora	Rosa multiflora	Rosaceae		Nakahama et al. 2020
Rubus spp. 2	Rubus crataegifolius	Rosaceae		Nakahama et al. 2020
Rubus mesogaeus	Rubus mesogaeus	Rosaceae	LC586464
Rubus spp. 1	Rubus palmatus	Rosaceae		Nakahama et al. 2020
Rubus spp. 1	Rubus parvifolius	Rosaceae		Nakahama et al. 2020
Rosaceae 1	Sorbus commixta	Rosaceae		Nakahama et al. 2020
Galium sp.	Galium japonicum	Rubiaceae		Nakahama et al. 2020
Galium sp.	Galium trifidum	Rubiaceae		Nakahama et al. 2020
Galium trifloriforme	Galium trifloriforme	Rubiaceae		Nakahama et al. 2020
Mitchella undulata	Mitchella undulata	Rubiaceae		Nakahama et al. 2020
Paederia foetida	Paederia foetida	Rubiaceae		Genbank
Rubia argyi	Rubia argyi	Rubiaceae		Genbank
Phellodendron amurence	Phellodendron amurence	Rutaceae		Nakahama et al. 2020
Zanthoxylum piperitum	Zanthoxylum piperitum	Rutaceae		Genbank
Zanthoxylum schinifolium	Zanthoxylum schinifolium	Rutaceae		Genbank
Meliosma myriantha	Meliosma myriantha	Sabiaceae		Nakahama et al. 2020
Acer spp.1	Acer amoenum var. matsumurae	Sapindaceae		Nakahama et al. 2020
Acer spp.2	Acer carpinifolium	Sapindaceae		Genbank
Acer cissifolium	Acer cissifolium	Sapindaceae	LC586455
Acer spp.1	Acer japonicum	Sapindaceae		Nakahama et al. 2020
Acer spp.2	Acer micranthum	Sapindaceae		Nakahama et al. 2020
Acer spp.2	Acer pictum	Sapindaceae		Nakahama et al. 2020
Acer spp.2	Acer rufinerve	Sapindaceae		Nakahama et al. 2020
Acer spp.1	Acer sieboldianum	Sapindaceae		Nakahama et al. 2020
Aesculus turbinata	Aesculus turbinata	Sapindaceae		Nakahama et al. 2020
Houttuynia cordata	Houttuynia cordata	Saururaceae		Nakahama et al. 2020
Astilbe spp.1	Astilbe thunbergii	Saxifragaceae		Nakahama et al. 2020
Chrysosplenium grayanum	Chrysosplenium grayanum	Saxifragaceae		Genbank
Mitella spp.	Mitella pauciflora	Saxifragaceae		Nakahama et al. 2020
Rodgersia podophylla	Rodgersia podophylla	Saxifragaceae		Genbank
Tiarella polyphylla	Tiarella polyphylla	Saxifragaceae		Genbank
Schisandra repanda	Schisandra repanda	Schisandraceae		Nakahama et al. 2020
Smilacaceae 1	Smilax china	Smilacaceae		Nakahama et al. 2020
Smilacaceae 1	Smilax riparia var. ussuriensis	Smilacaceae		Nakahama et al. 2020
Stachyurus praecox	Stachyurus praecox	Stachyuraceae		Nakahama et al. 2020
Staphylea bumalda	Staphylea bumalda	Staphyleaceae		Genbank
Styrax spp.1	Styrax japonicus	Styracaceae		Nakahama et al. 2020
Styrax spp.1	Styrax obassia	Styracaceae		Nakahama et al. 2020
Symplocos coreana	Symplocos coreana	Symplocaceae		Nakahama et al. 2020
Symplocos sawafutagi	Symplocos sawafutagi	Symplocaceae		Nakahama et al. 2020
Taxaceae 1	Caphalotaxus harringtonia var. nana	Taxaceae		Nakahama et al. 2020
Ulmaceae 1	Ulmus davidiana	Ulmaceae		Nakahama et al. 2020
Ulmaceae 1	Ulmus laciniata	Ulmaceae		Nakahama et al. 2020
Ulmaceae 1	Zelkova serrata	Ulmaceae		Genbank
Boehmeria silvestrii	Boehmeria silvestrii	Urticaceae		Nakahama et al. 2020
Urticaceae 1	Boehmeria spicata	Urticaceae		Genbank
Elatostema involucratum	Elatostema involucratum	Urticaceae		Nakahama et al. 2020
Laportea bulbifera	Laportea bulbifera	Urticaceae		Genbank
Laportea cuspidata	Laportea cuspidata	Urticaceae	LC586482
Pilea pumila	Pilea pumila	Urticaceae	LC586481
Pilea japonica	Pilea japonica	Urticaceae	LC586480
Viola grypoceras	Viola grypoceras	Violaceae		Nakahama et al. 2020
Viola vaginata	Viola vaginata	Violaceae		Nakahama et al. 2020
Viola verecunda	Viola verecunda	Violaceae	LC586471
Vitaceae 1	Ampelopsis glandulosa	Vitaceae		Nakahama et al. 2020
Vitaceae 1	Vitis coignetiae	Vitaceae		Genbank
Vitaceae 1	Vitis flexuosa var.flexuosa	Vitaceae		Nakahama et al. 2020

## Sheet: Table S4
Table S4
List of plant species and their coverage per plot, MDG, averaged among deer establishment years, and their categorized group by K-means analyses. 279 plant taxa used in either of the analyses are shown.
Family	trnL 6loop database	Species	life form	Plant architecture	Clustered groups			Coverage per plot				MDG
					Coverage	MDG	Diet	1978	2003	2011	2014	1978	2003	2011	2014
Actinidiaceae	○	Actinidia arguta	vine		G1			0.1	0.6	0.1	0.475	na	na	na	na
Actinidiaceae	○	Actinidia polygama	vine		G1	G4	G1	0.075	0.075	0.1	0.4	na	1	0	0
Adoxaceae	○	Sambucus racemosa	tree					na	0.2	0.35	0.65	na	na	na	na
Adoxaceae	○	Viburnum dilatatum	shrub		G1	G3	G2	0.075	0.59	0.75	0.19	30	7.30769	2.65734	0.797101
Adoxaceae	○	Viburnum furcatum	shrub			G4		na	0.425	0.425	2.5125	na	1.3474	0	2.17544
Adoxaceae	○	Viburnum opulus var. sargentii	shrub				G2	na	na	0.25	na	na	na	na	na
Adoxaceae	○	Viburnum wrightii	shrub					na	0.2	0.2	0.533333	na	na	na	na
Amaranthaceae	○	Achyranthes bidentata	perennial	errect				na	na	na	0.883333	na	na	na	na
Amaranthaceae	-	Chenopodium album	annual/biennial	errect				na	na	na	0.05	na	na	na	na
Anacardiaceae	○	Rhus javanica	shrub				G2	na	3.25	0.1	0.4	na	na	na	na
Anacardiaceae	○	Toxicodendron orientale	vine					na	0.35	0.266667	0.1	na	na	na	na
Anacardiaceae	○	Toxicodendron trichocarpum	shrub				G1	na	na	na	0.075	na	na	na	na
Apiaceae	○	Angelica edulis	perennial	errect				na	0.25	na	na	na	na	na	na
Apiaceae	○	Cryptotaenia japonica	perennial	errect	G1	G1		0.05	0.15	0.3625	0.07	1.13636	2.50862	8.27566	0
Apiaceae	○	Oenanthe lavanica	perennial	errect				0.05	na	0.1	na	na	na	na	na
Apiaceae	○	Sanicula chinensis	perennial	errect		G1		na	0.7	0.45	0.34	0	3.64011	1.97619	0.3125
Apiaceae	-	Sium serra	perennial	errect				na	na	na	0.2	na	na	na	na
Apiaceae	○	Spuriopimpinella calycina	perennial	errect				0.075	na	0.9	0.25	na	na	na	na
Apiaceae	○	Tilingia ajanensis	perennial	errect				na	na	na	0.1	na	na	na	na
Apiaceae	○	Torilis japonica	annual/biennial	errect	G2	G3		0.5	0.316667	0.2625	0.1	9.25	3.88889	2.02381	0
Apocynaceae	○	Cynanchum caudatum	vine					0.15	0.6	na	na	na	na	na	na
Aquifoliaceae	○	Ilex crenata	shrub					na	na	na	0.75	na	na	na	na
Aquifoliaceae	○	Ilex macropoda	tree				G2	na	0.1	0.425	0.1	na	na	na	na
Araceae	○	Arisaema sp.	perennial	errect				0.2	na	0.05	na	na	na	na	na
Araceae	○	Lysichiton camtschatcensis	perennial	errect				na	na	na	0.15	na	na	na	na
Araliaceae	○	Aralia cordata	perennial	errect		G3		0.25	na	2.4	na	4.33333	1.81818	0.588235	0
Araliaceae	○	Aralia elata	shrub				G2	na	0.4	na	0.675	na	na	na	na
Araliaceae	○	Chengiopanax sciadophylloides	tree					na	0.6	0.85	0.425	na	na	na	na
Araliaceae	○	Eleutherococcus spinosus	shrub				G3	na	0.25	0.15	0.1	na	na	na	na
Araliaceae	○	Gamblea innovans	tree					na	na	0.05	na	na	na	na	na
Araliaceae	○	Hedera rhombea	vine				G1	na	na	na	0.4	na	na	na	na
Araliaceae	○	Hydrocotyle maritima	perennial				G2	0.375	na	0.05	0.05	na	na	na	na
Araliaceae	○	Kalopanax septemlobus	tree		G1		G2	0.1	0.183333	0.2	0.3	na	na	na	na
Araliaceae	○	Panax japonicus	perennial	errect				na	na	na	0.1	na	na	na	na
Aristolochiaceae	○	Asarum tohokuense	perennial	errect				na	0.075	0.05	na	na	na	na	na
Asparagaceae	○	Hosta sieboldiana	perennial	errect				na	0.1	0.1	0.1	na	na	na	na
Asparagaceae	-	Maianthemum dilatatum	perennial	prostrate				na	0.0666667	0.1	0.05	na	na	na	na
Asparagaceae	○	Maianthemum japonicum	perennial	errect				na	0.26	0.25	0.158333	na	na	na	na
Asteraceae	○	Adenocaulon himalaicum	perennial	errect	G1		G3	0.15	0.2	0.716667	0.4	na	na	na	na
Asteraceae	○	Ainsliaea apiculata	perennial	errect	G1	G4	G3	0.2	0.116667	0.5375	0.25	na	0	0.357143	0
Asteraceae	○	Artemisia indica	perennial	errect		G3		na	0.25	0.625	1.23333	3.47806	0.794369	0.930242	0
Asteraceae	○	Artemisia japonica	perennial	errect				0.05	na	0.2	na	na	na	na	na
Asteraceae	○	Aster glehnii	perennial	errect				na	na	0.7	0.1	na	na	na	na
Asteraceae	○	Aster microcephalus	perennial	rosset(seasonal)	G1	G3	G3	0.25	na	1.35	0.716667	2.85714	2.50311	0.652174	0
Asteraceae	○	Aster savatieri	perennial	errect		G3	G3	0.1	0.7	0.625	0.133333	3.56061	1.43292	0.454545	0.277778
Asteraceae	-	Aster scaber	perennial	errect				na	0.3	0.1	na	na	na	na	na
Asteraceae	○	Bidens frondosa L.	annual/biennial	errect				na	0.25	na	1.225	na	na	na	na
Asteraceae	○	Carpesium divaricatum	perennial	errect			G3	na	na	na	0.25	na	na	na	na
Asteraceae	○	Carpesium triste	perennial	rosset(seasonal)			G3	0.05	0.05	0.1	na	na	na	na	na
Asteraceae	○	Cirsium borealinipponense	perennial	rosset(seasonal)				na	na	0.01	na	na	na	na	na
Asteraceae	○	Cirsium sp.	perennial	rosset(seasonal)			G3	na	0.125	0.05	0.1	na	na	na	na
Asteraceae	○	Crepidiastrum denticulatum	perennial	rosset(seasonal)				na	na	na	0.1	na	na	na	na
Asteraceae	○	Erigeron philadelphicus	perennial	rosset(seasonal)				na	na	0.05	0.15	na	na	na	na
Asteraceae	○	Eupatorium glehnii	perennial	errect				na	na	0.1	na	na	na	na	na
Asteraceae	○	Eupatorium makinoi	perennial	errect	G1	G2	G3	0.55	0.05	0.25	0.983333	11.9247	1.16587	3.21429	5.03623
Asteraceae	○	Ixeridium dentatum	perennial	errect				na	0.6	na	na	na	na	na	na
Asteraceae	○	Parasenecio delphiniifolius	perennial	errect				0.1	na	1.475	0.15	na	na	na	na
Asteraceae	○	Parasenecio farfarifolius	perennial	errect	G1	G3		0.15	0.45	na	0.77	3	0.863095	2.71429	0.625
Asteraceae	○	Parasenecio farfarifolius var. bulbifer	perennial	errect	G2			0.3	0.075	0.2	0.05	na	na	na	na
Asteraceae	○	Parasenecio robustus	perennial	errect				na	0.4	0.15	0.3	na	na	na	na
Asteraceae	○	Petasites japonicus	perennial	rosset(seasonal)	G1	G4		0.15	0.35	0.5	0.4	na	0.5	0	0
Asteraceae	○	Rudbeckia laciniata	perennial	rosset(seasonal)		G4	G3	na	0.35	na	0.425	na	5	14.4444	0
Asteraceae	○	Solidago virgaurea	perennial	rosset(seasonal)	G2	G3		0.35	0.4	0.4375	0.2	4.5749	3.291	0.8125	0
Asteraceae	○	Syneilesis palmata	perennial	errect				0.225	na	0.15	na	na	na	na	na
Asteraceae	-	Synurus pungens	perennial	rosset(seasonal)				na	na	na	0.15	na	na	na	na
Balsaminaceae	○	Impatiens noli-tangere	annual/biennial	errect	G1			0.05	0.05	0.4	0.1	na	na	na	na
Balsaminaceae	○	impatiens textorii	annual/biennial	errect				na	0.15	0.225	0.6	na	na	na	na
Berberidaceae	○	Epimedium koreanum	perennial	errect				na	na	0.05	0.325	na	na	na	na
Betulaceae	○	Betula ermanii	tree				G3	na	0.05	na	na	na	na	na	na
Betulaceae	○	Betula grossa	tree				G1	0.01	na	na	na	na	na	na	na
Betulaceae	○	Carpinus cordata	tree		G2	G4	G2	0.15	na	0.583333	0.25	na	2	1.75	0
Betulaceae	○	Carpinus laxiflora	tree		G2		G2	na	0.975	0.475	0.4	3.18182	0.714286	0.369048	0
Betulaceae	○	Carpinus tschonoskii	tree					0.85	na	na	0.25	na	na	na	na
Betulaceae	○	Corylus sieboldiana	shrub			G4		na	1.13333	na	0.75	na	1e-07	1e-07	1e-07
Betulaceae	○	Ostrya japonica	tree					na	na	0.1	na	na	na	na	na
Brassicaceae	○	Cardamine leucantha	perennial	errect	G2			0.4	0.05	0.1	0.075	na	na	na	na
Brassicaceae	-	Wasabia japonica	perennial	errect				na	0.05	na	na	na	na	na	na
Campanulaceae	○	Adenophora remotiflora	perennial	errect				na	na	0.1	na	na	na	na	na
Caprifoliaceae	○	Abelia spathulata	shrub				G2	na	na	na	0.01	na	na	na	na
Caprifoliaceae	○	Lonicera gracilipes	shrub		G1			0.1	1.18333	1.35	1	na	na	na	na
Caprifoliaceae	○	Lonicera japonica	vine					na	na	na	0.1	na	na	na	na
Caprifoliaceae	○	Weigela hortensis	shrub				G2	na	0.95	na	1	na	na	na	na
Caryophyllaceae	○	Stellaria uliginosa var. undulata	perennial				G2	0.01	na	na	na	na	na	na	na
Celastraceae	○	Celastrus orbiculatus	vine				G2	na	na	0.175	na	na	na	na	na
Celastraceae	○	Euonymus alatus var. altus f. striatus	shrub				G2	na	na	na	0.6	na	na	na	na
Celastraceae	○	Euonymus alatus var. altus	shrub				G1	na	na	na	0.01	na	na	na	na
Celastraceae	○	Euonymus oxyphyllus	shrub					na	0.6	0.3	0.65	na	na	na	na
Cercidiphyllaceae	○	Cercidiphyllum japonicum	tree				G2	na	na	0.25	na	na	na	na	na
Chloranthaceae	○	Chloranthus serratus	perennial	errect	G2	G2		4.25	0.1	0.3	0.34	1.67424	0	0	0
Clethraceae	○	Clethra barbinervis	tree				G2	0.05	na	na	1.68333	na	na	na	na
Colchicaceae	○	Disporum smilacinum	perennial	errect			G1	0.05	na	0.3	0.1	na	na	na	na
Commelinaceae	○	Commelina communis	annual/biennial	prostrate			G2	0.15	na	na	na	na	na	na	na
Cornaceae	○	Alangium platanifolium	shrub				G3	0.15	na	0.35	3.15	na	na	na	na
Cornaceae	○	Cornus controversa	tree				G2	na	na	0.05	1.25	na	na	na	na
Cornaceae	○	Cornus kousa	tree					na	na	na	0.925	na	na	na	na
Cornaceae	○	Cornus macrophylla	tree					na	na	na	0.175	na	na	na	na
Cornaceae	-	Helwingia japonica	shrub					na	na	0.75	na	na	na	na	na
Cucurbitaceae	○	Schizopepon bryoniifolius	vine					na	na	na	0.1	na	na	na	na
Cupressaceae	○	Chamaecyparis obtusa	tree				G2	0.35	0.175	na	na	na	na	na	na
Cyperaceae	○	Carex muitifolia	perennial	tussock	G1			0.1	6.05	7.275	2.45	na	na	na	na
Cyperaceae	○	Carex sp.	perennial	tussock				8.75	na	na	0.15	na	na	na	na
Daphniphyllaceae	○	Daphniphyllum macropodum	shrub					na	na	na	0.75	na	na	na	na
Diapensiaceae	○	Schizocodon soldanelloides	perennial	prostrate			G1	na	na	na	0.3	na	na	na	na
Diapensiaceae	○	Shortia uniflora	perennial				G1	na	na	na	0.02	na	na	na	na
Dioscoreaceae	○	Dioscorea japonica	vine					na	0.25	na	0.25	na	na	na	na
Dioscoreaceae	○	Dioscorea nipponica	vine					na	na	0.2	0.15	na	na	na	na
Dioscoreaceae	○	Dioscorea quinquelobata	vine					na	0.0666667	0.133333	0.1	na	na	na	na
Dioscoreaceae	○	Dioscorea tokoro	vine					na	na	na	0.233333	na	na	na	na
Ericaceae	-	Chimaphila japonica	shrub					na	0.05	na	na	na	na	na	na
Ericaceae	○	Elliottia paniculata	shrub					na	na	na	2.1	na	na	na	na
Ericaceae	○	Pryola japonica	perennial	errect				na	na	0.05	0.05	na	na	na	na
Ericaceae	○	Rhododendron pentandrum	shrub					na	1.25	na	0.5	na	na	na	na
Ericaceae	○	Rhododendron kaempferi	shrub			G2		2.425	1.75	na	0.85	27.7262	6.66667	1.66667	2.95853
Ericaceae	○	Vaccinium japonicum	shrub				G3	na	na	0.35	0.1	na	na	na	na
Euphorbiaceae	-	Euphorbia sieboldiana	perennial	errect				na	na	na	0.05	na	na	na	na
Fabaceae	○	Amphicarpaea edgeworthii	vine				G2	0.45	na	0.05	0.15	na	na	na	na
Fabaceae	○	Hylodesmum podocarpum	perennial	errect	G1	G4		0.25	0.075	0.275	0.5625	na	0.555556	0.227273	0
Fabaceae	○	Lespedeza bicolor	shrub				G2	0.05	0.75	0.25	na	na	na	na	na
Fabaceae	○	Pueraria lobata	vine				G3	na	0.55	na	0.15	na	na	na	na
Fabaceae	○	Trifolium pratense	perennial	prostrate				na	na	na	0.1	na	na	na	na
Fabaceae	○	Wisteria floribunda	vine		G1	G4	G2	0.1	0.75	1.56667	1.71667	na	0.844854	0	0.211362
Fagaceae	○	Castanea crenata	tree				G2	na	0.25	0.1	0.4	na	na	na	na
Fagaceae	○	Fagus crenata	tree					0.2	na	0.266667	4.95	na	na	na	na
Fagaceae	○	Quercus crispula	tree		G1		G1	0.125	1.01667	0.35	0.707143	na	na	na	na
Fagaceae	○	Quercus serrata	tree		G1		G1	na	0.75	0.05	na	na	na	na	na
Garryaceae	○	Aucuba japonica var. boreali	shrub				G1	na	na	na	3.71667	na	na	na	na
Gentianaceae	○	Swertia bimaculata	perennial	errect				na	na	0.05	0.05	na	na	na	na
Gentianaceae	○	Tripterospermum japonicum	vine					na	na	0.05	0.1	na	na	na	na
Geraniaceae	○	Geranium thunbergii	perennial	rosset(seasonal)	G1	G1		0.1	0.05	0.15	0.15	0	0.555556	0	0
Hamamelidaceae	○	Hamamelis japonica	tree					na	na	na	1.5	na	na	na	na
Hydrangeaceae	○	Calyptranthe petiolaris	vine		G2			0.5	0.216667	0.833333	0.325	na	na	na	na
Hydrangeaceae	○	Heteromalla paniculata	shrub			G4		na	0.7	0.433333	0.85	na	18.509	6.85688	1.17289
Hydrangeaceae	○	Hortensia cuspidata	shrub		G1	G3	G3	0.1	0.325	0.883333	1.3	17.3077	10.5227	2.02669	3.54464
Hydrangeaceae	○	Philadelphus satsumi	shrub					na	na	0.2	na	na	na	na	na
Hydrangeaceae	○	Schizophragma hydrangeoides	vine		G1	G3		0.0625	0.1625	na	1.81667	1	1.84211	0	0
Hypericaceae	○	Hypericum erectum	perennial	errect				na	0.075	na	0.0666667	na	na	na	na
Juglandaceae	○	Juglans mandshurica	tree				G2	na	na	na	na	na	na	na	na
Juglandaceae	○	Pterocarya rhoifolia	tree		G2		G3	2.325	0.425	0.9875	0.6	na	na	na	na
Lamiaceae	○	Ajuga sp.	perennial				G2	na	na	na	na	na	na	na	na
Lamiaceae	○	Callicarpa japonica	shrub		G1	G2	G3	0.575	0.15	0.75	1.15	11.5874	0.454545	2.1875	0.67619
Lamiaceae	○	Chelonopsis moschata	perennial	errect				na	na	na	0.75	na	na	na	na
Lamiaceae	○	Clerodendrum trichotomum	tree					na	na	0.25	2.48333	na	na	na	na
Lamiaceae	○	Clinopodium sp.	perennial	prostrate	G1	G3		0.2125	0.25	0.45	0.25	0.588235	0.357143	0.31015	0
Lamiaceae	○	Comanthosphace japonica	perennial	errect				2.6	0.25	na	0.1	na	na	na	na
Lamiaceae	-	Elsholtzia ciliata	annual/biennial	errect				na	0.05	na	na	na	na	na	na
Lamiaceae	○	Isodon inflexus	perennial	errect				na	0.1	na	0.2	na	na	na	na
Lamiaceae	○	Isodon trichocarpus	perennial	errect				na	na	na	0.25	na	na	na	na
Lamiaceae	○	Perilla citriodora	annual/biennial	errect				0.15	na	na	na	na	na	na	na
Lamiaceae	○	Slvia nippponica	perennial	errect				na	0.45	na	0.7	na	na	na	na
Lamiaceae	-	Teucrium viscidum var. miquelianum	perennial	prostrate				na	0.1	na	na	na	na	na	na
Lardizabalaceae	○	Akebia quinata	vine					na	0.275	0.2	0.55	na	na	na	na
Lardizabalaceae	○	Akebia trifoliata	vine					na	na	0.05	0.7	na	na	na	na
Lauraceae	-	Lindera praecox	shrub					na	na	0.2	na	na	na	na	na
Lauraceae	○	Lindera umbellata var. membranacea	shrub		G1	G2	G2	0.666667	2.98333	0.65	2.03333	11.9265	1.55405	1.02679	0.122449
Liliaceae	○	Cardiocrinum cordatum	perennial	errect				na	0.25	na	na	na	na	na	na
Liliaceae	-	Lilium medeoloides	perennial	errect				na	na	na	0.1	na	na	na	na
Liliaceae	○	Tricyrtis affinis	perennial	errect	G2	G2		0.375	0.2	0.075	0.1	6.17424	1.00446	0	0.384615
Liliaceae	○	Tricyrtis latifolia	perennial	errect				na	0.1	na	0.1	na	na	na	na
Lythraceae	○	Lythrum anceps	perennial				G1	na	na	na	na	na	na	na	na
Magnoliaceae	○	Magnolia kobus	tree					na	0.2	0.05	0.15	na	na	na	na
Magnoliaceae	○	Magnolia obovata	tree		G1		G3	0.05	0.05	0.15	0.15	na	na	na	na
Magnoliaceae	○	Magnolia salicfolia	tree					na	na	na	3.25	na	na	na	na
Malvaceae	○	Tilia japonica	tree				G2	na	na	0.01	na	na	na	na	na
Melanthiaceae	○	Paris tetraphylla	perennial	errect				na	0.05	0.05	na	na	na	na	na
Melanthiaceae	○	Trillium apetalon	perennial	errect				na	na	na	0.05	na	na	na	na
Moraceae	○	Morus australis	shrub				G1	na	na	0.1	0.433333	na	na	na	na
Oleaceae	○	Fraxinus sieboldiana	tree		G1	G3	G2	0.45	0.55	1.08333	1.15	22.1806	7.5965	2.96141	1
Oleaceae	○	Ligustrum obtusifolium	shrub				G3	na	1.975	1.025	na	na	na	na	na
Onagraceae	○	Circaea erubescens	perennial	errect			G2	0.05	na	na	na	na	na	na	na
Orchidaceae	-	Cremastra appendiculata	perennial	errect				na	na	na	0.05	na	na	na	na
Orchidaceae	○	Goodyera schlechtendaliana	perennial	errect				0.05	na	na	0.05	na	na	na	na
Oxalidaceae	○	Oxalis corniculata	perennial	prostrate			G2	na	na	na	0.05	na	na	na	na
Oxalidaceae	○	Oxalis griffithii	perennial	prostrate				na	na	na	0.15	na	na	na	na
Papaveraceae	-	Corydalis ochotensis	annual/biennial					na	0.1	na	na	na	na	na	na
Papaveraceae	○	Macleaya cordata	perennial	errect				na	na	na	0.1	na	na	na	na
Phrymaceae	○	Phryma nana	perennial	errect	G2			0.175	0.25	0.15	0.15	na	na	na	na
Pinaceae	○	Larix kaempferi	tree				G1	na	na	na	0.1	na	na	na	na
Pinaceae	○	Pinus densiflora	tree				G3	na	na	na	0.01	na	na	na	na
Plantaginaceae	○	Plantago asiatica	perennial	rosset			G1	na	0.1	na	0.075	na	na	na	na
Plantaginaceae	○	Veronicastrum sibiricum	perennial	errect				na	0.05	0.15	na	na	na	na	na
Poaceae	○	Miscanthus sinensis	perennial	tussock				na	na	na	0.25	na	na	na	na
Poaceae	○	Oplismenus undulatifolius	perennial	tussock				0.133333	0.075	0.166667	0.625	na	na	na	na
Poaceae	○	Sasa sp.	perennial	tussock	G1	G3	G1	3.4	8.56667	9.825	8.425	25	5.00022	4.28307	0.353692
Polygonaceae	○	Fallopia japonica	perennial	errect				na	0.25	na	0.05	na	na	na	na
Polygonaceae	○	Fallopia sachalinensis	perennial	errect				na	na	na	0.75	na	na	na	na
Polygonaceae	○	Persicaria debilis	annual/biennial	errect	G2	G3		2.05	0.95	1.85	0.1	4.13978	3.22917	0.357684	0.147059
Polygonaceae	○	Persicaria filiformis	perennial	errect	G2	G3	G3	1.225	0.45	0.5125	0.51	3.5117	3.14583	1.80719	0.12
Polygonaceae	○	Persicaria longiseta	annual/biennial	errect				na	na	na	0.05	na	na	na	na
Polygonaceae	○	Persicaria muricata	perennial				G2	na	na	na	na	na	na	na	na
Polygonaceae	○	Persicaria nepalensis	annual/biennial	errect				na	0.25	na	0.075	na	na	na	na
Polygonaceae	○	Persicaria posumbu	annual/biennial	errect				0.075	0.3	na	0.8	na	na	na	na
Polygonaceae	○	Persicaria thunbergii	annual/biennial	errect			G1	na	na	0.1	4.25	na	na	na	na
Primulaceae	○	Ardisia japonica	shrub					na	na	na	0.2	na	na	na	na
Primulaceae	○	Lysimachia fortunei	perennial	errect		G2	G2	na	0.15	0.133333	0.8875	7.03125	0.370879	2.5	5.68954
Primulaceae	○	Lysimachia japonica	perennial	errect				0.05	na	na	na	na	na	na	na
Primulaceae	○	Primula japonica	perennial	errect				na	na	0.05	na	na	na	na	na
Ranunculaceae	○	Aconitum sp.	perennial	errect				na	na	0.1	na	na	na	na	na
Ranunculaceae	○	Actaea asiatica	perennial	errect				na	na	na	0.1	na	na	na	na
Ranunculaceae	-	Aquilegia buergeriana	perennial	errect				na	na	na	0.05	na	na	na	na
Ranunculaceae	○	Cimicifuga japonica	perennial	errect				na	0.15	0.175	na	na	na	na	na
Ranunculaceae	○	Cimicifuga simplex	perennial	errect	G1			0.35	0.35	0.55	0.725	na	na	na	na
Ranunculaceae	○	Clematis apiifolia	vine		G1			0.1	0.05	0.2	0.55	na	na	na	na
Ranunculaceae	-	Clematis stans	perennial	errect				na	0.15	na	0.375	na	na	na	na
Ranunculaceae	○	Glaucidium palmatum	perennial	errect				na	na	na	0.1	na	na	na	na
Ranunculaceae	○	Ranunculus silerifolius	perennial	errect				0.075	na	0.4	0.15	na	na	na	na
Rhamnaceae	○	Berchemia racemosa	vine				G1	na	0.1	0.15	0.3375	na	na	na	na
Rhamnaceae	○	Hovenia trichocarpa	tree				G2	na	na	na	na	na	na	na	na
Rosaceae	○	Agrimonia pilosa	perennial	errect	G1			0.05	0.15	0.4	0.1	na	na	na	na
Rosaceae	○	Aria alnifolia	tree				G2	na	0.05	0.075	0.175	na	na	na	na
Rosaceae	○	Aruncus dioicus	perennial	errect				0.1	na	na	0.95	na	na	na	na
Rosaceae	○	Cerasus sp.	tree				G2	na	na	na	0.01	na	na	na	na
Rosaceae	○	Filipendula camtschatica	perennial	errect				na	na	na	0.375	na	na	na	na
Rosaceae	-	Geum japonicum	perennial	errect				na	0.05	na	na	na	na	na	na
Rosaceae	○	Kerria japonica	shrub		G1	G4	G1	0.05	na	0.375	4.35	na	13	1	2.62821
Rosaceae	○	Neillia incisa	shrub				G1	0.15	1.75	na	3.61667	na	na	na	na
Rosaceae	○	Padus grayana	tree			G4	G2	na	1.675	0.225	1.225	na	1	0	0
Rosaceae	○	Potentilla centigrana	perennial				G2	0.4	0.175	na	0.1	na	na	na	na
Rosaceae	○	Potentilla fragarioides	perennial	errect				0.35	0.75	na	0.075	na	na	na	na
Rosaceae	○	Potentilla freyniana	perennial	errect				na	na	0.35	na	na	na	na	na
Rosaceae	○	Pourthiaea villosa	shrub					na	0.25	0.35	na	na	na	na	na
Rosaceae	○	Rosa multiflora	shrub				G1	na	0.05	0.1	2.3	na	na	na	na
Rosaceae	○	Rubus crataegifolius	shrub		G1	G2	G2	0.05	na	0.975	0.8125	8.58696	0.25	0.931753	0.718182
Rosaceae	○	Rubus mesogaeus	shrub				G2	0.05	0.15	na	na	na	na	na	na
Rosaceae	-	Rubus microphyllus	shrub					0.15	na	na	5.65	na	na	na	na
Rosaceae	○	Rubus palmatus	shrub		G1	G3	G1	0.5	0.975	0.675	1.30714	6.31434	5.46703	5.48664	1.58825
Rosaceae	○	Rubus parvifolius	shrub					na	na	na	0.1	na	na	na	na
Rosaceae	○	Sorbus commixta	tree				G2	na	na	na	0.01	na	na	na	na
Rubiaceae	○	Galium japonicum	perennial	errect				na	0.425	0.425	0.1	na	na	na	na
Rubiaceae	○	Galium trifidum	perennial	prostrate				0.05	na	na	0.05	na	na	na	na
Rubiaceae	○	Galium trifloriforme	perennial	errect			G3	na	0.01	na	na	na	na	na	na
Rubiaceae	○	Mitchella undulata	vine				G3	na	na	na	0.4	na	na	na	na
Rubiaceae	○	Paederia foetida	vine					na	na	na	0.2	na	na	na	na
Rubiaceae	○	Rubia argyi	vine					na	na	0.15	0.15	na	na	na	na
Rutaceae	○	Phellodendron amurence	tree				G3	na	na	na	0.01	na	na	na	na
Rutaceae	○	Zanthoxylum piperitum	shrub					0.1	0.25	na	0.1	na	na	na	na
Rutaceae	○	Zanthoxylum schinifolium	shrub					na	na	na	0.01	na	na	na	na
Sabiaceae	○	Meliosma myriantha	tree					na	na	na	0.425	na	na	na	na
Sapindaceae	○	Acer amoenum	tree		G1	G4	G2	0.25	0.7125	0.6875	0.983333	na	2.85714	1	1
Sapindaceae	○	Acer carpinifolium	tree					2.7	na	na	na	na	na	na	na
Sapindaceae	○	Acer cissifolium	tree					na	0.05	na	0.25	na	na	na	na
Sapindaceae	○	Acer japonicum	tree		G1	G4	G2	0.05	na	0.116667	0.525	na	4.69697	0	0
Sapindaceae	○	Acer micranthum	tree					0.25	na	na	na	na	na	na	na
Sapindaceae	○	Acer pictum	tree		G1	G2	G2	0.166667	0.183333	0.45	0.783333	1.15385	0	0	0
Sapindaceae	○	Acer rufinerve	tree		G2	G2	G2	0.333333	0.4	0.35	0.1	9.07754	1.81034	2.2619	1.42921
Sapindaceae	○	Acer sieboldianum	tree					na	0.075	na	na	na	na	na	na
Sapindaceae	○	Aesculus turbinata	tree				G2	na	0.4	0.25	0.35	na	na	na	na
Saururaceae	○	Houttuynia cordata	perennial	errect				na	na	na	0.01	na	na	na	na
Saxifragaceae	○	Astilbe thunbergii	perennial	errect	G1	G3	G1	0.225	0.35	0.6125	1.72	6.07143	3.77232	1.19231	0.406667
Saxifragaceae	○	Chrysosplenium grayanum	perennial					na	na	0.05	na	na	na	na	na
Saxifragaceae	○	Mitella pauciflora	perennial	errect			G3	na	na	na	2.75	na	na	na	na
Saxifragaceae	○	Rodgersia podophylla	perennial	errect		G4		na	0.4	0.15	0.1	na	0.511509	2.5	0
Saxifragaceae	○	Tiarella polyphylla	perennial	errect				na	0.1	na	na	na	na	na	na
Schisandraceae	○	Schisandra repanda	vine				G2	na	na	na	0.01	na	na	na	na
Smilacaceae	○	Smilax china	vine					na	na	na	0.166667	na	na	na	na
Smilacaceae	○	Smilax riparia	perennial					na	0.216667	0.175	0.191667	na	na	na	na
Stachyuraceae	○	Stachyurus praecox	shrub				G1	na	na	na	1.125	na	na	na	na
Staphyleaceae	○	Staphylea bumalda	shrub			G4	G3	na	1.75	0.1	3.74	na	18	24.625	3.46761
Styracaceae	○	Styrax japonicus	tree					na	1.25	0.15	0.625	na	na	na	na
Styracaceae	○	Styrax obassia	shrub		G1			0.075	0.125	0.45	0.3125	na	na	na	na
Symplocaceae	○	Symplocos sawafutagi	shrub					na	0.1	na	na	na	na	na	na
Taxaceae	○	Caphalotaxus harringtonia	shrub					na	na	0.2	0.125	na	na	na	na
Taxodiaceae	○	Cryptomeria japonica	tree		G1	G1	G3	0.05	0.075	0.05	0.76	0.384615	0	10.9416	0.284091
Ulmaceae	○	Ulmus davidiana	tree				G2	na	na	0.75	na	na	na	na	na
Ulmaceae	○	Ulmus laciniata	tree				G2	na	na	na	na	na	na	na	na
Ulmaceae	○	Zelkova serrata	tree		G1		G2	0.166667	0.05	0.15	0.466667	na	na	na	na
Urticaceae	○	Boehmeria silvestrii	perennial	prostrate		G2	G1	0.2	na	2.36667	1.48333	8.33333	11.5789	5.50178	3.38587
Urticaceae	○	Boehmeria spicata	shrub					na	na	0.1	0.1	na	na	na	na
Urticaceae	○	Elatostema involucratum	perennial	prostrate	G1	G3		0.2	0.65	5.425	3.975	8.46154	8.77232	5.27229	0.7
Urticaceae	○	Laportea bulbifera	perennial	prostrate	G2		G2	0.516667	0.316667	1.18333	0.2125	na	na	na	na
Urticaceae	○	Laportea cuspidata	perennial	prostrate	G2	G3	G3	9.3	0.65	2.875	0.9	4.54545	1.36364	1.65441	0
Urticaceae	○	Pilea pumila	annual/biennial	prostrate				na	0.075	0.15	0.4	na	na	na	na
Urticaceae	○	Pilea japonica	annual/biennial	prostrate			G2	0.1	na	na	na	na	na	na	na
Valerianaceae	-	Patrinia villosa	perennial	errect				na	0.25	na	0.0833333	na	na	na	na
Violaceae	○	Viola grypoceras	perennial	rosset	G2			0.133333	0.35	0.05	0.07	na	na	na	na
Violaceae	○	Viola vaginata	perennial	rosset			G2	na	0.2	na	0.075	na	na	na	na
Violaceae	○	Viola verecunda	perennial	rosset				0.15	na	na	na	na	na	na	na
Vitaceae	○	Ampelopsis glandulosa	vine				G2	na	na	na	0.75	na	na	na	na
Vitaceae	○	Vitis coignetiae	vine					na	0.1	0.05	na	na	na	na	na
Vitaceae	○	Vitis flexuosa	vine				G2	na	na	na	0.1	na	na	na	na

## Sheet: Table S5
Table S5
List of plant taxa and their proportion of number of DNA reads averaged among deer establishment years and their categorized group by K-means analyses.
Family	Plant taxa	Lifes form	Plant architecture	1978	2003	2011	2014	Group
Actinidiaceae	Actinidia arguta	vine		0.0178353	0.088676	0.0497281	0.0996261	1
Adoxaceae	Viburnum opulus var. sargentii	shrub		0.00257477	0.00182659	0.00150728	0.000288462	2
Adoxaceae	Viburnum spp.	shrub		0.0130385	0.00508901	0.00569148	0.00331197	2
Anacardiaceae	Rhus javanica	shrub		0.00807703	0	0.000494387	0.0109615	1
Anacardiaceae	Toxicodendron spp.	shrub		0.00296275	0.139721	0.0102374	0.0119444	2
Aquifoliaceae	Ilex spp.	tree		0.0247131	0.00159032	0.00399127	0.00108974	2
Araliaceae	Aralia elata	shrub		0.00121097	0.00129043	0.000108524	0.000267094	2
Araliaceae	Eleutherococcus spinosus	shrub		0.000399737	0.000363501	0.0431443	0.000149573	3
Araliaceae	Hedera rhombea	vine		2.35e-05	0.000763352	1.21e-05	0.00352564	1
Araliaceae	Hydrocotyle spp.	perennial	rosset	0.00162246	0.00239002	0	0	2
Araliaceae	Kalopanax septemlobus	tree		0.00506725	0.000236276	0.000301455	0.00042735	2
Asteraceae	Ainsliaea apiculata	perennial	errect	2.35e-05	5.45e-05	0.00165198	0.000235043	3
Asteraceae	Aster spp.	perennial	rosset(seasonal)	0.000670147	0.000354413	0.00267692	4.27e-05	3
Asteraceae	Asteraceae spp.	perennial	errect	0.00118745	0.000908752	0.00907984	0.000811966	3
Asteraceae	Cirsium spp.	perennial	rosset(seasonal)	0.000693661	0.000163575	0.00962246	0.00436966	3
Asteraceae	Eupatorium spp.	perennial	errect	0.000235139	7.27e-05	0.00783784	0.000160256	3
Betulaceae	Betula ermanii	tree		0.00502022	0.00446197	0.0114191	0.000106838	3
Betulaceae	Betula grossa	tree		0.0125094	0.00305341	0.00396715	0.0182479	1
Betulaceae	Betulaceae spp.	tree		0.10466	0.0298343	0.00768108	0.017094	2
Caprifoliaceae	Abelia spathulata	shrub		0.0352239	0.000254451	0.00102495	0.000277778	2
Caprifoliaceae	Weigela hortensis	shrub		0.0104755	0.024509	0.00230312	0	2
Caryophyllaceae	Stellaria uliginosa var. undulata	annual/biennial	prostrate	0.000940557	0	0	0	2
Celastraceae	Euonymus alatus var. altus	shrub		0	0.00608864	7.23e-05	0.0127778	1
Celastraceae	Euonymus alatus var. altus f. striatus	shrub		3.53e-05	0.00118138	0.00102495	0.00418803	1
Cercidiphyllaceae	Cercidiphyllum japonicum	tree		0.0021045	0.0013813	2.41e-05	0	2
Clethraceae	Celastrus orbiculatus	vine		0.00182233	0.00275352	0.000916424	0.000897436	2
Clethraceae	Clethra barbinervis	shrub		0.00235139	0	3.62e-05	0	2
Colchicaceae	Alangium platanifolium	shrub		0.000834744	2.73e-05	0.0147231	0.000683761	3
Colchicaceae	Cornus controversa	tree		0.154886	0.23693	0.0993597	0.019156	2
Colchicaceae	Disporum smilacinum	perennial	errect	1.18e-05	0.000408938	0.000723493	0.000608974	1
Commelinaceae	Commelina communis	perennial	prostrate	0.00338601	0.000390763	4.82e-05	0.000555556	2
Cupressaceae	Chamaecyparis obtusa	tree		0.000693661	0.0267446	0	0	2
Diapensiaceae	Schizocodon soldanelloides	perennial	rosset	0	0	0	0.00326923	1
Ericaceae	Vaccinium japonicum	shrub		3.53e-05	0.00010905	0.0017605	0.000267094	3
Fabaceae	Amphicarpaea edgeworthii	vine		0.00493792	2.73e-05	4.82e-05	0.000320513	2
Fabaceae	Lespedeza bicolor	perennial	errect	0.0550461	0.00156305	0.00572765	0.00042735	2
Fabaceae	Pueraria lobata	vine		0.000517306	0	0.00437713	0.0020406	3
Fabaceae	Wisteria floribunda	vine		0.0123448	0.000699739	0.00798254	0.00728632	2
Fagaceae	Castanea crenata	tree		0.00426778	0.0016721	0.00319543	0.00448718	2
Fagaceae	Quercus spp.	tree		0.0856612	0.0200289	0.0180391	0.111517	1
Garryaceae	Aucuba japonica var. borealis	shrub		0	0	3.62e-05	0.00742521	1
Hydrangeaceae	Hortensia cuspidata	shrub		0.00332722	0.00198108	0.0179065	1.07e-05	3
Juglandaceae	Juglans mandshurica	tree		0.00407966	0.000163575	0.00148316	0.000202991	2
Juglandaceae	Pterocarya rhoifolia	shrub		0.00114043	0.00119046	0.00425655	1.07e-05	3
Lamiaceae	Ajuga spp.	perennial	rosset	0.00902934	0.000163575	0	0	2
Lamiaceae	Callicarpa japonica	shrub		0.000129327	0	0.0011817	0	3
Lauraceae	Lindera umbellata	shrub		0.00470278	9.09e-05	0.000602911	7.48e-05	2
Lythraceae	Lythrum anceps	perennial	errect	0	0	0	0.00255342	1
Magnoliaceae	Magnolia spp.	shrub		0.00250423	9.09e-06	0.00411185	0.000117521	3
Malvaceae	Tilia japonica	tree		0.00103461	0.000708827	0.00126611	1.07e-05	2
Moraceae	Morus australis	shrub		0.000305681	0.000399851	0.00901955	0.0215812	1
Oleaceae	Fraxinus sieboldiana	shrub		0.0174591	0.0042257	0.00020499	2.14e-05	2
Oleaceae	Ligustrum obtusifolium	shrub		0.00011757	0.000218101	0.00198961	2.14e-05	3
Oxalidaceae	Oxalis corniculata	perennial	prostrate	0.00599605	9.09e-05	1.21e-05	1.07e-05	2
Pinaceae	Larix kaempferi	tree		0.000105813	0.00266264	0.000241164	0.000844017	1
Pinaceae	Pinus densiflora	tree		0.00238666	7.27e-05	0.0226936	0.000117521	3
Plantaginaceae	Plantago asiatica	perennial	rosset	0.000435008	0.000517989	0.000241164	0.0622329	1
Poaceae	Oplismenus undulatifolius	perennial	tussock	0.00015284	9.09e-06	7.23e-05	0.000897436	1
Poaceae	Sasa spp.	perennial	tussock	0.00406791	0.0472915	0.036669	0.0488889	1
Polygonaceae	Circaea erubescens	perennial	errect	0.00752445	0.00982361	0.00178462	5.34e-05	2
Polygonaceae	Fallopia spp.	perennial	errect	1.18e-05	0.000163575	0.00255634	0.0169124	1
Polygonaceae	Persicaria filiformis	perennial	errect	0.0182821	0.0633128	0.0766059	0.00729701	3
Polygonaceae	Persicaria muricata	perennial	prostrate	0.00211625	0.00941467	0.00033763	0.000854701	2
Polygonaceae	Persicaria posumbu	annual/biennial	errect	0.0530592	0.0125862	0.0111177	0.0234295	2
Polygonaceae	Persicaria thunbergii	perennial	errect	0.00924097	0.0492998	0.00494387	0.0288248	1
Primulaceae	Lysimachia fortunei	perennial	errect	0.00429129	0.00141765	0.00307485	0.00169872	2
Primulaceae	Lysimachia japonica	perennial	rosset	0.00168125	0	0.000301455	1.07e-05	2
Rhamnaceae	Berchemia racemosa	shrub		0.000435008	9.09e-05	0.000832017	0.00387821	1
Rhamnaceae	Hovenia trichocarpa	tree		0.000164597	0	0.00620998	0.000705128	3
Rosaceae	Cerasus spp.	tree		0.00612538	0.00493452	0.00420832	0.000459402	2
Rosaceae	Kerria japonica	shrub		0.000223382	0	0.00154345	0.0123718	1
Rosaceae	Neillia incisa	shrub		0.00196341	0	4.82e-05	0.00176282	1
Rosaceae	Potentilla centigrana	vine		0.00128151	0	0	0	2
Rosaceae	Rosa multiflora	shrub		0.000293924	0.0194109	0.000639086	0.0805449	1
Rosaceae	Rosaceae tree	tree		0.00191638	0.000908752	0.000144699	0.000106838	2
Rosaceae	Rubus mesogaeus	shrub		0.00552577	0.000581601	0.00102495	0.00104701	2
Rosaceae	Rubus spp.1	shrub		0.0233493	0.0487364	0.131314	0.155021	1
Rosaceae	Rubus spp.2	shrub		0.0946318	0.0163394	0.0701788	0.0746047	2
Rubiaceae	Galium trifloriforme	perennial	errect	1.18e-05	0.000381676	0.00107318	2.14e-05	3
Rubiaceae	Mitchella undulata	vine		0	0	0.00567942	0.000245726	3
Rutaceae	Phellodendron amurence	tree		0.000258653	0	0.002279	1.07e-05	3
Sapindaceae	Acer spp.1	tree		0.0173298	0.0105324	0.0212586	0.00584402	2
Sapindaceae	Acer spp.2	tree		0.0470161	0.00276261	0.0276857	0.00996795	2
Sapindaceae	Aesculus turbinata	tree		0.00111691	0.00608864	0.00159169	4.27e-05	2
Saxifragaceae	Astilbe thunbergii	perennial	rosset(seasonal)	0.0163422	0.0114957	0.0268657	0.0246688	1
Saxifragaceae	Mitella spp.	perennial	rosset(seasonal)	4.7e-05	0.000572514	0.0226936	5.34e-05	3
Schisandraceae	Schisandra repanda	vine		0.0011757	0.00188112	0.000771726	0.000352564	2
Shortia uniflora	Shortia uniflora	perennial	rosset	0	0	0	0.0145726	1
Stachyuraceae	Stachyurus praecox	shrub		0	1.82e-05	2.41e-05	0.0186218	1
Staphyleaceae	Staphylea bumalda	shrub		0.000364466	0.00018175	0.00600499	0.00309829	3
Taxodiaceae	Cryptomeria japonica	tree		0.00965246	0.0121682	0.0988412	0.000352564	3
Ulmaceae	Ulmaceae spp.	tree		0.00268059	0.000454376	0.00283368	0.000555556	2
Urticaceae	Boehmeria spp.	perennial	prostrate	0.000470278	0.00120864	0.00678878	0.00688034	1
Urticaceae	Laportea bulbifera	perennial	prostrate	0.0021045	0.00608864	0.00406362	9.62e-05	2
Urticaceae	Laportea cuspidata	perennial	prostrate	0.00110515	0	0.00721081	0.00587607	3
Urticaceae	Pilea japonica	perennial	prostrate	0.00353885	0.00010905	0	0	2
Violaceae	Viola vaginata	perennial	rosset	0.000176354	0.000118138	2.41e-05	4.27e-05	2
Vitaceae	Vitaceae 1	vine		0.0294159	0.043502	0.014916	0.0126709	2
